# Supplementary material for: An Immunohistochemical Panel of Three SUMO&nbsp;Genes Predicts Outcomes of Patients With Triple-negative Breast Cancer
Source: Research Square preprint supplement (doi:10.21203/rs.3.rs-109613/v1), 2020-11-19
Supplement: Supplementary file 1 [file e1e36f4492e8adf1cb9c5cd4.xlsx]

## Sheet: Sheet1
No.	Age	Age group (2, >50; 1,≤50)	T group (2, >2cm; 1,≤2cm)	N group (2, yes; 1, no)	G group (2, III; 1, I+II)	Lymphovascular invasion (2, yes; 1, no)	Type of surgery (1, total mastectomy; 2, breast conserving surgery)	Chemotherapy group (1, yes; 2, no)	Radotherapy group (1, yes; 2, no)	Recurrence (1, yes; 0, no)	DFS	Death (1, yes; 0, no)	OS	Sumo1 tumor staining intensity score	Sumo1 tumor stained positive cells	Sumo1 normal staining intensity score	Sumo1 normal stained positive cells		Sumo2 tumor staining intensity score	Sumo2 tumor stained positive cells	Sumo2 normal staining intensity score	Sumo2 normal stained positive cells		Sumo3 tumor staining intensity score	Sumo3 tumor stained positive cells	Sumo3 normal staining intensity score	Sumo3 normal stained positive cells
1	51	2	2	1	2	2	1	1	2	1	4.9	1	11	3	3	1	2		3	4	2	3		3	3	1	3
2	55	2	2	1	2	2	1	1	2	1	4.9	1	12	3	4	0	0		3	4	2	4		3	3	1	2
3	27	1	2	1	2	1	1	1	1	1	6.2	1	11.1	3	3	2	3		3	3	2	3		3	4	2	3
4	69	2	2	1	1	2	1	1	1	1	7.1	1	14	2	4	1	2		3	4	3	4		3	4	1	2
5	48	1	2	1	2	2	2	1	1	1	8.1	1	15.1	3	4	2	4		2	4	2	4		3	3	2	4
6	32	1	2	1	2	2	1	1	1	1	9.1	0	45.6	2	3	1	3		3	4	2	3		2	3	3	4
7	41	1	2	1	1	2	1	1	1	1	9.2	1	23.3	3	4	1	2		2	4	2	3		3	4	3	4
8	42	1	2	1	2	2	1	1	2	1	10.3	0	38.7	2	4	1	1		3	4	2	4		3	3	1	3
9	58	2	1	1	2	2	1	1	1	1	11.1	1	19.3	3	3	1	4		3	3	3	4		3	4	3	4
10	53	2	2	1	2	1	1	1	2	1	12.2	1	24.2	3	4	2	4		3	4	2	3		3	4	2	2
11	58	2	2	1	2	1	1	1	1	1	13.2	1	15.2	3	4	3	3		3	3	2	3		3	3	3	2
12	72	2	1	1	2	1	1	1	2	1	15.2	0	37.6	1	4	2	2		3	3	3	4		2	4	3	4
13	55	2	1	1	2	2	1	1	1	1	15.7	1	36.3	2	3	1	3		3	4	3	3		2	4	3	4
14	56	2	2	1	2	2	1	1	1	1	15.7	1	27.1	2	4	1	2		3	4	3	4		3	4	2	4
15	42	1	1	1	2	2	1	1	1	1	17.1	1	27.4	2	4	2	4		2	3	2	2		3	3	2	1
16	62	2	2	0	1	2	1	2		1	18	1	30	3	4	1	3		3	4	3	4		3	4	2	3
17	47	1	2	0	2	1	1	1		1	18.3	0	49.4	3	3	1	1		3	4	2	1		2	3	1	2
18	49	1	2	0	2	1	1	1		1	19.2	1	25.3	3	3	2	4		2	3	1	2		2	4	1	2
19	60	2	1	1	2	1	1	1	1	1	20.3	1	25.2	2	4	2	3		3	4	2	3		2	3	2	2
20	42	1	2	0	2	2	1	1		1	21.5	0	43.2	3	3	2	1		3	3	3	3		3	3	2	1
21	43	1	2	0	2	1	1	1		1	23.2	0	43.4	2	2	2	2		2	3	3	2		3	3	3	3
22	49	1	1	0	2	2	1	2		1	23.3	1	24.3	3	4	0	0		2	2	1	1		2	4	3	4
23	58	2	2	1	1	2	1	1	1	1	23.3	1	26.3	2	4	1	3		2	4	2	4		2	4	1	2
24	64	2	2	1	1	2	1	1	1	1	23.3	0	66	2	3	3	3		2	3	2	1		2	3	3	2
25	45	1	2	0	2	2	2	1	1	1	24.2	0	38.6	2	3	1	4		2	4	2	4		2	3	1	3
26	49	1	2	0	2	2	1	1		1	24.2	0	42.5	2	2	1	2		2	3	3	3		2	2	2	2
27	45	1	2	1	2	2	1	2	2	1	25.2	0	39.6	3	2	1	2		3	4	2	3		3	3	2	2
28	39	1	2	1	2	1	1	1	2	1	25.3	1	26.33	2	4	2	2		3	4	3	4		3	4	2	4
29	56	2	1	1	2	1	1	1	2	1	26.8	0	45.6	3	3	2	1		2	3	2	3		2	4	2	4
30	51	2	2	1	1	1	1	1	2	1	28.5	0	43.2	2	4	3	4		2	4	3	3		2	3	2	4
31	43	1	2	0	2	2	1	1		1	28.7	0	47.2	3	3	2	3		3	4	2	4		3	4	3	3
32	53	2	1	0	2	1	1	1		1	31.4	1	42.3	3	4	1	2		2	4	2	3		3	4	1	4
33	51	2	2	1	1	2	1	1	1	1	32.7	0	44.3	2	4	2	1		3	3	3	4		2	4	2	4
34	36	1	2	1	2	2	1	1	2	1	33.3	1	41.4	2	3	2	4		3	4	3	4		2	4	3	4
35	43	1	2	1	2	1	1	1	2	1	36.3	1	42.6	3	3	2	3		3	4	2	3		3	4	2	2
36	47	1	1	0	2	2	1	1		0	36.5333	0	36.5333	2	3	2	2		3	4	3	4		2	4	3	4
37	77	2	1	0	1	1	1	2		0	36.5333	0	36.5333	2	4	1	2		1	3	1	2		1	4	3	4
38	46	1	2	1	1	2	1	1	1	0	37.5667	0	37.5667	3	4	1	3		3	3	2	4		3	4	2	4
39	41	1	2	0	1	2	1	1		0	38.6	0	38.6	2	2	2	2		2	3	3	3		1	3	2	2
40	47	1	2	1	2	1	1	1	1	0	38.6	0	38.6	1	2	1	2		3	3	3	4		1	4	2	2
41	51	2	1	0	1	1	1	1		0	38.6	0	38.6	2	4	2	2		3	4	2	4		2	4	1	2
42	51	2	2	1	2	2	1	1	1	0	38.6	0	38.6	2	3	1	2		3	4	2	4		2	4	2	4
43	52	2	2	0	2	1	1	1		0	38.6	0	38.6	2	4	1	2		2	3	2	2		2	3	2	2
44	46	1	2	1	1	1	1	1	2	1	38.9	0	40.4	1	3	2	2		3	4	2	2		2	4	2	2
45	60	2	1	1	1	2	1	1	1	0	39.3333	0	39.3333	2	3	0	0		2	2	2	3		3	4	3	4
46	63	2	2	0	1	1	1	1		0	39.3333	0	39.3333	1	4	1	2		3	4	3	4		1	4	1	2
47	41	1	1	0	1	1	1	1		0	39.6	0	39.6	2	4	1	3		3	3	3	4		2	4	2	2
48	50	1	2	0	2	1	1	1		0	39.6	0	39.6	3	4	2	3		3	3	3	3		3	4	2	3
49	51	2	1	0	2	1	1	1		0	39.6	0	39.6	1	4	2	3		3	4	3	4		1	4	1	4
50	52	2	1	0	2	1	1	1		0	39.6	0	39.6	1	3	1	4		3	4	2	2		1	4	1	1
51	54	2	1	0	1	1	1	1		0	39.6	0	39.6	3	3	2	3		2	3	3	3		3	2	2	3
52	57	2	2	0	2	1	1	2		0	39.6	0	39.6	3	4	1	3		3	4	3	4		3	3	2	4
53	58	2	2	0	1	1	1	1		0	39.6	0	39.6	2	2	2	2		3	3	3	3		2	4	2	2
54	66	2	1	1	1	1	1	1	1	0	40.6333	0	40.6333	2	3	3	2		3	2	2	3		3	4	3	3
55	41	1	1	1	1	2	1	1	2	0	41.6333	0	41.6333	3	2	1	2		2	3	3	4		3	4	3	4
56	60	2	1	0	2	1	1	1		0	41.6333	0	41.6333	2	4	0	0		2	3	1	3		1	4	2	4
57	40	1	1	1	1	1	1	1	2	0	42.6633	0	42.6633	3	4	2	4		2	4	2	3		2	4	2	4
58	33	1	2	0	2	1	1	1		0	42.6667	0	42.6667	3	4	3	4		3	4	3	4		2	3	2	2
59	47	1	1	0	1	1	1	1		0	42.6667	0	42.6667	2	4	2	4		2	4	3	4		2	4	3	4
60	49	1	2	1	2	2	1	1	1	0	42.6667	0	42.6667	3	4	1	4		2	4	1	3		3	4	1	4
61	52	2	1	0	1	2	1	1		0	43.5967	0	43.5967	1	4	0	0		1	3	3	4		2	4	3	4
62	34	1	2	0	2	1	1	1		0	43.6	0	43.6	2	3	2	3		2	3	2	3		3	3	2	2
63	55	2	2	1	1	1	1	1	1	0	43.6	0	43.6	2	2	1	2		2	3	2	2		2	3	2	3
64	34	1	1	1	2	2	1	1	1	0	44.3633	0	44.3633	2	3	1	3		3	4	3	4		2	3	3	4
65	39	1	2	1	2	2	1	1	2	0	44.3633	0	44.3633	2	4	2	3		3	4	3	4		2	4	2	2
66	40	1	2	1	1	2	1	1	2	0	44.3633	0	44.3633	1	1	1	2		3	4	2	4		1	4	1	4
67	48	1	2	1	2	2	1	1	1	0	44.3633	0	44.3633	2	4	1	4		2	4	2	2		3	4	3	4
68	39	1	2	1	2	2	1	1	1	1	44.5	0	53.8	2	2	2	2		3	2	2	3		3	4	2	4
69	66	2	2	1	2	2	1	1	2	0	45.6667	0	45.6667	2	2	2	2		3	3	3	3		2	3	2	3
70	52	2	1	0	2	2	1	1		0	46.6667	0	46.6667	3	4	2	4		1	4	3	4		2	4	3	4
71	65	2	1	0	2	1	1	1		0	46.6667	0	46.6667	3	4	2	3		3	4	3	4		3	4	3	4
72	70	2	1	1	2	1	1	1	2	0	46.6667	0	46.6667	3	4	2	4		2	3	3	4		2	4	2	4
73	45	1	1	0	2	1	1	1		0	47.7	0	47.7	1	4	0	0		3	4	3	4		1	4	2	2
74	48	1	2	1	1	1	1	1	2	0	47.7	0	47.7	3	4	3	3		3	3	2	2		2	2	3	2
75	34	1	1	0	2	1	1	1		0	48.7	0	48.7	2	3	2	2		3	3	2	3		2	2	1	1
76	44	1	1	1	2	1	1	1	2	0	48.7	0	48.7	3	4	2	4		2	2	2	2		3	4	3	4
77	54	2	2	0	1	1	1	1		0	48.7	0	48.7	3	4	0	0		3	4	3	4		2	4	2	4
78	58	2	1	0	2	1	1	1		0	48.7	0	48.7	2	3	2	2		2	3	2	2		2	3	2	2
79	59	2	1	1	1	2	1	1	1	0	48.7	0	48.7	2	4	2	3		2	2	1	2		2	2	3	4
80	62	2	2	0	1	1	1	1		0	48.7	0	48.7	2	3	2	3		3	4	3	3		2	3	1	3
81	34	1	2	1	1	1	1	1	1	0	50.7667	0	50.7667	2	4	2	3		3	3	3	4		2	3	2	2
82	41	1	2	1	1	2	1	1	1	0	50.7667	0	50.7667	2	4	2	2		3	4	2	4		2	4	3	4
83	44	1	1	0	2	1	2	1	1	0	50.7667	0	50.7667	2	3	1	3		2	3	3	4		2	3	1	4
84	48	1	2	1	2	2	1	1	2	0	51.7667	0	51.7667	3	2	1	3		2	2	2	2		2	4	2	4
85	56	2	1	0	2	1	1	1		0	51.7667	0	51.7667	3	3	2	3		2	3	2	3		2	2	2	2
86	60	2	2	0	2	2	1	1		0	51.7667	0	51.7667	1	3	1	2		3	4	2	3		1	4	2	4
87	61	2	1	0	2	1	1	1		0	51.7667	0	51.7667	2	4	2	4		3	4	3	4		2	3	3	4
88	38	1	1	1	2	2	1	1	1	0	52.8	0	52.8	2	3	3	3		3	4	2	4		3	4	2	4
89	53	2	2	0	1	1	1	1		0	52.8	0	52.8	3	3	1	3		2	3	3	4		2	4	3	4
90	55	2	1	0	2	1	1	1		0	52.8	0	52.8	2	4	1	4		1	2	2	2		2	4	3	4
91	60	2	2	0	1	1	1	1		0	52.8	0	52.8	2	4	0	0		3	4	3	4		2	2	1	1
92	71	2	2	1	2	1	1	2	2	0	52.8	0	52.8	2	4	1	2		3	4	3	4		2	3	2	4
93	47	1	2	1	1	1	1	1	1	0	53.8	0	53.8	3	4	1	4		2	4	2	3		2	3	2	4
94	48	1	2	1	2	2	1	1	2	0	53.8	0	53.8	2	4	2	2		2	2	1	2		2	3	2	2
95	40	1	2	0	2	1	2	1	1	0	54.8333	0	54.8333	2	4	2	2		3	4	2	3		2	3	2	1
96	53	2	2	0	2	1	1	1		0	54.8333	0	54.8333	2	2	2	3		3	3	2	4		2	3	1	2
97	55	2	1	1	2	1	1	1	2	0	54.8333	0	54.8333	2	3	2	3		1	2	2	2		2	2	3	3
98	43	1	2	0	1	1	1	1		0	55.8	0	55.8	2	4	1	4		2	3	3	4		2	3	3	4
99	51	2	1	1	2	2	1	1	1	0	56.8333	0	56.8333	2	4	1	3		3	4	3	4		2	3	2	2
100	57	2	1	1	1	2	1	1	1	0	56.8333	0	56.8333	3	4	3	4		2	3	2	3		2	4	1	2
101	59	2	2	1	1	1	1	1	2	0	56.8333	0	56.8333	2	3	2	4		2	3	3	4		2	4	3	4
102	63	2	2	0	2	1	1	1		0	56.8333	0	56.8333	3	4	1	2		3	4	3	3		2	3	2	2
103	27	1	2	0	2	1	2	1	1	0	58.8667	0	58.8667	2	2	2	2		3	3	2	2		2	3	2	2
104	40	1	2	1	1	1	1	1	1	0	58.8667	0	58.8667	3	4	1	2		3	4	3	4		3	4	2	3
105	41	1	2	0	1	1	1	1		0	58.8667	0	58.8667	2	4	0	0		3	3	3	4		2	4	1	2
106	41	1	1	0	2	1	2	1	1	0	58.8667	0	58.8667	3	4	1	4		3	3	2	3		3	4	1	2
107	45	1	1	0	2	1	1	1		0	58.8667	0	58.8667	2	4	2	2		3	4	2	3		2	3	1	1
108	51	2	2	1	1	1	1	1	1	0	60.9	0	60.9	2	3	2	4		2	3	2	2		2	4	2	3
109	58	2	1	0	2	1	1	2		0	60.9	0	60.9	1	4	2	1		3	4	3	4		2	4	3	4
110	66	2	2	0	1	2	1	2		0	60.9	0	60.9	2	1	1	2		2	3	2	2		2	3	1	1
111	53	2	1	1	2	1	1	1	1	0	61.9333	0	61.9333	2	3	2	3		3	3	2	3		2	4	2	4
112	53	2	2	1	1	1	1	1	2	0	62.9633	0	62.9633	3	4	2	2		3	4	3	3		2	3	2	2
113	58	2	1	1	2	1	1	1	1	0	62.9633	0	62.9633	2	3	2	3		3	4	3	4		3	4	2	4
114	47	1	1	0	1	1	1	1		0	62.9667	0	62.9667	2	2	1	4		3	3	2	3		2	3	2	4
115	58	2	2	0	2	2	1	1		0	62.9667	0	62.9667	3	4	1	3		2	3	2	3		2	4	1	4
116	41	1	2	0	2	1	1	1		0	63.9633	0	63.9633	2	4	2	4		3	3	3	4		1	4	2	2
117	45	1	1	1	1	2	1	1	2	0	63.9633	0	63.9633	2	3	2	4		2	4	3	4		2	4	3	4
118	49	1	2	1	2	1	1	1	1	0	63.9633	0	63.9633	2	3	1	2		2	4	3	4		3	4	2	4
119	53	2	1	0	1	1	1	1		0	63.9633	0	63.9633	3	3	1	3		3	3	2	3		3	4	3	4
120	57	2	2	0	2	1	1	1		0	63.9633	0	63.9633	2	3	1	3		3	4	3	4		2	3	3	4
121	39	1	2	1	2	2	1	1	1	0	63.9667	0	63.9667	3	4	3	4		2	3	2	3		2	3	2	4
122	41	1	1	0	1	1	1	1		0	63.9667	0	63.9667	2	3	2	4		3	4	2	3		1	4	2	3
123	49	1	2	1	2	1	1	1	2	0	64.9967	0	64.9967	2	2	1	4		2	3	3	2		2	4	3	4
124	50	1	1	1	2	1	1	1	2	0	64.9967	0	64.9967	2	3	1	4		2	3	2	4		2	2	2	2
125	50	1	2	0	1	1	1	1		0	65	0	65	3	4	3	4		2	3	2	2		2	4	2	4
126	51	2	2	0	1	1	1	1		0	65	0	65	2	4	1	2		1	3	1	3		2	4	2	4
127	59	2	2	0	2	1	1	1		0	65	0	65	1	1	1	1		2	3	3	3		1	3	1	1
128	47	1	2	0	2	1	1	1		0	66	0	66	3	4	3	3		3	4	1	4		3	4	2	4
129	41	1	1	1	1	1	1	1	1	0	67.9667	0	67.9667	2	3	2	2		3	3	2	3		2	3	3	3
130	39	1	2	0	2	1	1	1		0	68	0	68	3	4	2	4		3	4	2	3		2	3	2	2
131	43	1	2	0	1	1	1	1		0	68	0	68	2	4	1	2		2	3	3	3		3	4	3	4
132	54	2	2	1	2	1	1	1	1	0	68	0	68	2	2	1	2		2	3	2	3		3	3	2	3
133	54	2	2	0	2	1	1	1		0	68	0	68	3	2	1	4		2	4	3	4		3	4	3	4
134	59	2	1	0	2	1	1	1		0	68	0	68	3	4	1	2		3	3	3	4		1	4	3	4
135	61	2	2	1	2	1	1	1	1	0	68	0	68	3	4	1	1		2	4	2	2		2	3	2	2
136	74	2	2	0	1	1	1	2		0	68	0	68	3	4	1	2		3	4	3	4		2	4	2	4
137	32	1	1	0	2	1	2	1	1	0	70	0	70	2	2	1	3		2	3	2	1		3	4	3	4
138	57	2	2	0	1	1	1	1		0	72.0667	0	72.0667	2	3	2	2		3	3	3	3		2	2	1	2
139	44	1	2	0	2	1	1	1		0	73	0	73	2	3	2	2		3	4	3	4		2	4	2	3
140	40	1	1	0	1	1	2	1	1	0	6	0	76	3	4	2	3		2	3	3	3		2	3	2	2
141	44	1	1	0	2	2	1	1		0	74	0	74	2	4	1	2		3	4	2	3		2	4	2	4
142	57	2	1	0	1	1	1	1		0	77	0	77	2	2	1	4		2	3	2	4		1	4	2	4
143	59	2	2	0	2	1	1	1		0	75	0	75	2	2	0	0		3	4	2	3		3	4	2	3
144	60	2	2	0	1	2	1	1		0	75.1333	0	75.1333	2	3	2	2		2	2	2	3		3	3	2	2
145	69	2	1	1	2	2	1	1	1	0	69	0	69	2	3	2	3		2	3	2	3		2	3	2	2
146	51	2	2	0	2	1	1	1		0	66	0	66	2	4	2	4		3	4	2	4		2	2	2	1
147	51	2	2	0	2	1	1	1		0	66	0	66	2	4	1	3		2	3	3	4		2	3	1	2
148	45	1	2	0	2	1	1	1		0	66	0	66	3	3	3	4		2	2	2	2		2	3	3	3
149	50	1	1	0	1	1	1	1		0	63.9667	0	63.9667	2	3	2	4		3	4	3	4		2	3	2	2
150	56	2	2	0	1	1	1	1		0	60.9	0	60.9	3	3	2	1		2	3	2	2		2	3	2	2
151	64	2	2	0	1	1	1	1		0	59.9	0	59.9	2	2	2	2		2	4	2	3		2	3	1	2
152	58	2	1	0	1	1	1	2		0	57.8667	0	57.8667	3	4	1	2		2	2	1	2		2	4	2	4
153	58	2	2	1	2	1	1	1	2	0	57.8667	0	57.8667	3	3	2	4		3	4	2	3		2	3	2	2
154	57	2	1	0	2	1	1	1		0	57.8667	0	57.8667	3	2	2	2		3	3	2	4		2	4	2	2
155	68	2	2	0	2	1	1	1		0	56.8333	0	56.8333	2	4	2	4		3	2	2	2		3	3	2	3
156	52	2	1	0	2	1	1	1		0	56.8333	0	56.8333	3	4	1	4		2	3	2	2		2	4	1	2
157	40	1	2	0	2	2	1	2		1	23.66	1	31.87	3	3	2	2		2	4	2	2		3	3	2	2
158	45	1	1	1	1	1	1	1	1	1	40.5667	0	54.8333	2	2	2	2		3	4	2	3		2	3	2	2
159	41	1	2	0	2	1	1	1		1	51.7667	0	54.8333	3	4	3	3		2	2	2	3		2	4	2	3
160	56	2	2	0	2	1	1	1		0	54.8333	0	54.8333	2	3	2	2		3	3	2	2		2	4	3	4
161	39	1	1	1	2	2	1	1	1	0	54.8333	0	54.8333	3	3	2	3		3	2	2	2		2	3	1	1
162	61	2	2	1	1	2	1	1	2	0	53.8	0	53.8	3	4	1	3		2	2	2	2		3	4	2	3
163	50	1	2	1	1	1	1	1	2	0	53.8	0	53.8	2	2	2	2		3	4	3	4		2	3	2	4
164	48	1	2	0	1	1	1	1		0	51.7667	0	51.7667	3	4	3	2		2	3	2	2		2	2	1	2
165	47	1	2	1	2	1	1	1	2	0	51.7667	0	51.7667	3	2	1	2		2	2	2	2		3	2	2	3
166	59	2	1	1	2	2	1	1	2	0	50.7667	0	50.7667	2	4	1	1		3	3	2	2		3	2	2	4
167	61	2	2	0	1	1	1	1		0	50.7667	0	50.7667	3	4	2	4		3	4	2	2		2	4	2	2
168	54	2	2	1	2	1	1	1	2	0	49.7333	0	49.7333	2	3	3	4		3	4	2	2		3	4	3	4
169	58	2	2	0	2	1	1	1		0	49.7333	0	49.7333	2	4	2	2		3	3	2	4		3	4	1	2
170	45	1	1	0	2	2	1	1		0	48.7	0	48.7	3	4	1	4		2	2	2	2		2	2	2	3
171	53	2	1	0	2	1	1	1		0	48.7	0	48.7	2	4	2	4		2	3	2	2		2	4	2	3
172	53	2	1	0	2	2	1	1		0	47.7	0	47.7	3	3	2	2		2	3	2	3		2	3	2	2
173	60	2	1	0	1	1	2	2	1	0	47.7	0	47.7	3	2	2	2		2	3	2	3		2	4	3	4
174	63	2	2	1	2	1	1	1	1	1	15.2333	1	18.2	3	4	2	4		3	3	3	4		3	3	1	3
175	62	2	2	1	2	2	1	1	1	0	46.6667	0	46.6667	3	3	2	3		3	4	3	3		2	4	3	4
176	52	2	1	0	2	2	1	1		0	45.6667	0	45.6667	3	3	2	3		2	2	2	2		3	3	2	2
177	60	2	1	0	2	2	1	1		0	42.6667	0	42.6667	3	3	2	2		2	3	1	2		2	3	2	3
178	44	1	2	0	2	1	1	1		0	42.6667	0	42.6667	3	2	2	2		3	4	3	4		2	3	1	4
179	68	2	2	0	2	2	1	1		0	42.6667	0	42.6667	2	3	3	2		3	3	3	3		2	4	2	2
180	55	2	2	1	1	2	1	1	2	0	40.6333	0	40.6333	3	2	2	2		3	2	2	3		2	2	1	3
181	39	1	2	0	2	1	1	1		0	37.5667	0	37.5667	2	4	2	2		2	3	3	2		3	4	2	2
182	58	2	2	1	1	2	1	2	1	1	6.03333	1	7.06667	3	4	3	4		3	3	1	3		3	4	2	3
183	31	1	2	0	2	1	1	1		0	36.5333	0	36.5333	3	4	3	4		2	4	2	3		2	3	2	4
184	43	1	1	0	2	1	1	1		0	36.5333	0	36.5333	2	3	2	4		3	3	3	4		2	4	2	2
185	48	1	2	0	2	1	1	1		0	38.6	0	38.6	2	3	2	3		3	4	2	4		2	2	3	4
186	43	1	1	0	1	1	2	1	1	0	64	0	64	3	3	2	3		2	3	3	4		2	3	2	3
187	51	2	2	0	1	1	1	1		0	61	0	61	3	3	2	2		2	3	2	2		2	2	2	2
188	61	2	2	1	2	1	1	1	1	0	64	0	64	2	4	2	4		2	3	2	2		2	3	3	4
189	50	1	1	0	2	1	1	1		0	38.2	0	38.2	2	3	3	3		3	4	2	2		2	3	3	4
190	51	2	1	0	1	1	1	1		0	39.8	0	39.8	1	3	1	2		3	4	3	4		2	4	2	4
191	60	2	1	0	2	2	1	1		0	41.2	0	41.2	2	4	1	4		3	4	2	4		2	4	2	2
192	44	1	2	0	2	1	1	1		0	43.5	0	43.5	3	4	3	3		2	3	3	4		2	2	2	4
193	58	2	2	0	1	1	1	1		0	37.6	0	37.6	2	4	1	2		1	2	1	1		2	3	3	4
194	66	2	1	1	1	1	1	1	1	0	45.633	0	45.633	2	4	2	2		3	2	2	2		3	4	2	4
195	41	1	1	1	1	2	1	1	2	0	41.6333	0	41.6333	2	4	2	2		3	2	2	2		2	4	2	3
196	55	2	2	1	2	1	1	1	1	1	15.3	1	18.2	3	3	2	2		3	3	2	3		2	4	3	4
197	43	1	2	1	2	2	1	2	2	1	28.9	0	41.5	3	3	2	2		2	2	1	2		2	2	2	2
198	53	2	2	1	1	2	1	1	1	1	34.7	0	48.3	2	2	2	2		3	4	2	3		3	3	2	4
199	44	1	2	0	2	1	1	1		1	24.3	0	47.4	2	2	3	3		3	3	2	4		3	3	2	4
200	47	1	2	0	2	2	2	1	1	1	22.2	0	40.6	3	3	2	2		3	3	2	2		2	4	1	2
201	53	2	1	0	1	1	1	1		0	42.5	0	42.5	2	3	2	3		2	3	3	4		2	4	2	2
202	54	2	2	1	1	2	1	1	2	0	40.6	0	40.6	3	3	3	3		3	4	2	2		1	4	3	4
203	45	1	2	1	2	1	1	1	1	0	58.6	0	58.6	2	4	2	2		2	3	2	3		2	3	2	4
204	44	1	2	0	1	2	1	1		0	40.6	0	40.6	3	2	1	2		2	3	3	4		2	3	2	2
205	55	2	2	0	1	1	1	1		0	39.8	0	39.8	2	3	2	3		2	3	2	2		2	2	2	4
206	63	2	1	1	1	1	1	1	1	0	41.3	0	41.3	2	2	2	3		2	4	2	3		2	4	2	2
207	57	2	2	0	1	2	1	1		0	58.877	0	58.877	2	3	2	2		2	3	2	3		2	3	2	3
208	48	1	1	0	2	1	1	1		0	43.6	0	43.6	3	4	2	4		3	3	2	2		2	3	2	2
209	61	2	1	1	1	1	1	1	1	0	39.8	0	39.8	2	4	2	2		2	4	3	4		3	4	3	4
210	53	2	2	0	1	1	1	1		0	51.3	0	51.3	2	2	2	2		2	4	2	2		1	4	1	3
211	44	1	2	0	2	1	1	1		0	45.1	0	45.1	3	2	1	4		2	3	2	3		3	4	3	2
212	54	2	1	1	1	2	1	1	1	0	37.5	0	37.5	3	2	1	2		3	2	2	2		2	3	2	2

## Sheet: Sheet2
		标本编号	姓名	年龄	肿瘤直径	T	淋巴结情况	N	组织学分级	Ki67	是否化疗	化疗方案	蒽环类使用	紫衫类使用	是否全切	是否放疗	BRCA
3A	3B	3	周善华	51	3.3	2	1/19	1	2	50	是	EC-T*8	是	是	是	是	无突变
4A	4B	4	张涵霖	39	2.1	2	2/26	1	3	80	是	3AC+2T	是	是	是	否	无突变
5A	5B	5	章素琴	50	2.8	2	0/4	0	3	95	否	无			否	否	无突变
8A	8B	8	易小珍	34	3.2	2	8/18	2	3	80	是	4AC+4T	是	是	是	是	突变
10A	10B	10	裴俐琴	55	1.8	1	5/18	2	2	40	是	4EC+4T	是	是	是	是	无突变
12A	12B	12	邹爱华	40	1.2	1	1/5	1	2	55	是	1EC-4T	是	是	是	否	无突变
14A	14B	14	宋梅英	61	2.2	2	4/20	2	3	90	是	4EC+4T	是	是	是	是	突变
15A	15B	15	黄仁秀	49	3.1	2	3/23	1	3	65	是	4EC+4T	是	是	是	否	无突变
17A	17B	17	陈素玲	45	1.7	1	1/30	1	2	85	是	4EC+4T	是	是	是	否	无突变
18A	18B	18	叶东华	41	2.5	2	0/2	0	3	85	是	4EC+4T	是	是	是	否	无突变
23A	23B	23	林赛华	53	2.5	2	1/19	1	2	60	是	4EC+4T	是	是	是	否	无突变
8N	8MT	8	邓建招	49	2.1	2	1/20	1	3	70	是	4EC+4T	是	是	是	是	无突变
10N	10MT	10	彭秀贞	51	2.5	2	1/21	1	2	75	是	4EC+4T	是	是	是	是	无突变
12N	12MT	12	杨建萍	49	2.3	2	0/20	0	3	90	是	4EC+4T	是	是	是	否	无突变
15N	15MT	15	林砚治	41	3.4	2	0/16	0	3	90	是	4EC+4T	是	是	是	否	无突变
20N	20MT	20	王葱治	63	3.5	2	0/20	0	3	80	是	4EC+4T	是	是	是	否	无突变
23N	23MT	23	丁东	57	3.5	2	3/17	1	3	70	是	4EC+4T	是	是	是	是	无突变
24N	24MT	24	林赛芳	43	3.5	2	0/21	0	3	90	是	4EC+4T	是	是	是	否	突变
26N	26MT	26	陈秋云	40	2.2	2	0/12	0	3	70	是	4EC+4T	是	是	否	是	无突变
29N	29MT	29	张贵美	58	2	1	24/27	3	3	95	是	4EC+4T	是	是	是	是	无突变
32N	32MT	32	黄梅香	34	3.8	2	4/15	2	2	35	是	4EC+4T	是	是	是	是	无突变
36N	36MT	36	林秀敏	45	2.9	2	0/4	0	3	95	是	4EC+4T	是	是	是	否	突变
40N	40MT	40	高玉秀	32	2.2	2	3/22	1	2	35	是	4EC+4T	是	是	是	是	突变
42N	42MT	42	王雪慧	55	2.5	2	6/19	2	2	50	是	AC*1+手术+AC*3+T*4	是	是	是	是	无突变
44N	44MT	44	李芬	49	3.8	2	10/18	3	3	70	是	4EC+4T	是	是	是	是	突变
46N	46MT	46	章素琴	50	2.6	2	0/28	0	3	95	否	无			是	否	无突变
50N	50MT	50	吴红	52	2.6	2	0/24	0	3	70	是	4EC+4T	是	是	是	否	无突变
51N	51MT	51	许月娥	51	1.8	1	0/2	0	3	30	是	4EC+4T	是	是	是	否	无突变
65N	65MT	65	陈芹娥	52	3.8	2	0/1	0	3	30	是	4EC+4T	是	是	是	否	无突变
66N	66MT	66	黄秀华	46	2.3	2	9/27	2	2	80	是	4EC+4T	是	是	是	是	突变
82N	82MT	82	林秀惠	40	4.1*3.0*2.3	2	9/24	2	3	50	是	4EC+4T	是	是	是	是	无突变
88N	88MT	88	王秀英	53	2.2×1.6×1.2cm	2	0/1	0	3	80	是	4EC+4T	是	是	是	否	无突变
97N	97MT	97	林宝珍	59	1.8*1.5*1.4cm	1	3/26	1	2	15	是	4EC+4T	是	是	是	是	无突变
98N	98MT	98	许华芳	41	2.5*1.5*1.2	2	6/14	2	3	15	是	4EC+4T	是	是	是	是	无突变
100N	100MT	100	李民雄	54	2.2*2*1.8	2	0/3	0	3	70	是	4EC+4T	是	是	否	是	无突变

## Sheet: Sheet3
		标本编号	姓名	年龄	肿瘤直径	T	淋巴结情况	N	组织学分级	Ki67	是否化疗	化疗方案	蒽环类使用	紫衫类使用	是否全切	是否放疗	BRCA
8A	8B	8	易小珍	34	3.2	2	8/18	2	3	80	是	4AC+4T	是	是	是	是	突变
42N	42MT	42	王雪慧	55	2.5	2	6/19	2	2	50	是	AC*1+手术+AC*3+T*4	是	是	是	是	无突变
14A	14B	14	宋梅英	61	2.2	2	4/20	2	3	90	是	4EC+4T	是	是	是	是	突变
98N	98MT	98	许华芳	41	2.5*1.5*1.2	2	6/14	2	3	15	是	4EC+4T	是	是	是	是	无突变
24N	24MT	24	林赛芳	43	3.5	2	0/21	0	3	90	是	4EC+4T	是	是	是	否	突变
18A	18B	18	叶东华	41	2.5	2	0/2	0	3	85	是	4EC+4T	是	是	是	否	无突变
36N	36MT	36	林秀敏	45	2.9	2	0/4	0	3	95	是	4EC+4T	是	是	是	否	突变
50N	50MT	50	吴红	52	2.6	2	0/24	0	3	70	是	4EC+4T	是	是	是	否	无突变
40N	40MT	40	高玉秀	32	2.2	2	3/22	1	2	35	是	4EC+4T	是	是	是	是	突变
3A	3B	3	周善华	51	3.3	2	1/19	1	2	50	是	EC-T*8	是	是	是	是	无突变
44N	44MT	44	李芬	49	3.8	2	10/18	3	3	70	是	4EC+4T	是	是	是	是	突变
82N	82MT	82	林秀惠	40	4.1*3.0*2.3	2	9/24	2	3	50	是	4EC+4T	是	是	是	是	无突变
66N	66MT	66	黄秀华	46	2.3	2	9/27	2	2	80	是	4EC+4T	是	是	是	是	突变
32N	32MT	32	黄梅香	34	3.8	2	4/15	2	2	35	是	4EC+4T	是	是	是	是	无突变
